# Supplementary material for: Grafting Delays Watermel on Fruit Ripening by Altering Gene Expression of ABA Centric Phytohormone Signaling
Source: Front Plant Sci. 2021 Feb 25;12:624319. doi: 10.3389/fpls.2021.624319 (PMC7947309; doi:10.3389/fpls.2021.624319)
Supplement: Supplementary file 1 [file Table_1.XLSX]

## Sheet: Table S1
Table S1. The list of the gene expression of ABA phytohormones signaling
Gene	Annotation	SG_10DAP	SG_18DAP	SG_26DAP	SG_34DAP	PG_10DAP	PG_18DAP	PG_26DAP	PG_34DAP	PG_40DAP
Cla000900	Protein phosphatase 2C	7.82	8.59	13.45	12.65	8.86	5.45	9.55	10.65	13.5
Cla002234	Protein phosphatase 2C	0.57	0.45	1.36	0.16	0.37	0.36	0.2	2.36	0.35
Cla002474	Protein phosphatase 2C-like	61.02	50.37	90.15	71.69	32.21	56.36	70.47	107.12	73.86
Cla002942	9-cis-epoxycarotenoid dioxygenase	1.45	0.11	0	0	0.41	0.1	0	0	0.02
Cla004138	Phosphatase 2C family protein	20.12	32.55	25.19	21.88	40.31	19.95	17.3	21.95	22.68
Cla004235	Abscisic acid receptor PYL8	126.88	52.47	68.53	51.62	43.49	69.28	60.11	70.18	66.51
Cla004264	ABIL3-like protein	11.41	17.41	16.72	18.22	27.26	12.16	16.98	20.15	18.63
Cla004269	Protein phosphatase-2C	43.49	24.27	21.25	19.24	20.25	32.98	23.27	17.56	22.31
Cla004409	Phosphatase 2C family protein	57.08	37.45	37.84	41.31	33.32	40.38	45.85	50.29	54.22
Cla004904	Abscisic acid receptor PYL8	45.61	17.1	13.16	13.35	29.18	14.57	8.78	10.8	13.1
Cla005175	Protein phosphatase 2C-like	261.07	181.27	190.41	139.23	348	185.1	148.77	158.64	113.28
Cla005404	9-cis-epoxycarotenoid dioxygenase 1	297.48	319.13	663.53	388.84	18.78	399.14	243.17	479.05	706.91
Cla005453	9-cis-epoxycarotenoid dioxygenase 1	74.42	7.02	1.04	0.28	31.53	13.26	1.17	0.4	0.15
Cla006604	Abscisic acid receptor PYR1	63.32	114.53	135.6	216.62	73.08	153.89	231.89	235.81	309.26
Cla007217	Protein phosphatase 2c	22.06	14.14	13.32	9.74	11.61	18.06	10.89	13.76	6.58
Cla007597	Protein phosphatase 2C	0.4	1.07	0.2	1.36	0.8	0.2	0.22	0.24	1.43
Cla007740	Protein phosphatase 2c	88.29	21	10.02	3.66	78.87	23.53	10.84	11.68	4.15
Cla008787	Protein phosphatase 2C containing protein	9.53	14.4	18.46	20.67	11.66	10.47	11.53	17.42	17.36
Cla008802	Abscisic acid receptor PYR1	87.02	89.82	150.52	262.2	104.1	128.17	135.1	168.63	156.63
Cla008920	Protein phosphatase 2C	45.82	78.52	53.34	41.76	120.95	45.99	46.21	78.83	37.2
Cla009280	Protein phosphatase 2C-like	27.46	62.81	131.48	212.83	27.19	25.83	39.65	288.4	369.82
Cla009390	Protein phosphatase 2C 70	23.27	10.33	11.37	15.25	15.12	14.68	15.3	11.99	17.18
Cla009414	ABI3-interacting protein 2	268.4	226.54	204.23	207.88	253.2	241.75	204.64	150.34	192.35
Cla009779	9-cis-epoxycarotenoid dioxygenase	29.16	112.55	48.94	65.86	10.88	34.85	74.08	71.63	45.3
Cla009834	Protein phosphatase 2C-like protein	0	0.13	0.24	7.56	0	0.43	0.75	0.55	1.19
Cla011942	Protein phosphatase 2C	0.42	0.08	0	0	0.85	0.02	0.01	0.02	0.04
Cla012350	Abscisic stress ripening	12380.5	20978.9	15378.7	11671	5091.79	25793.9	17386.3	14877.3	28876.6
Cla013306	Protein phosphatase 2C containing protein	19.99	18.25	75.6	29.61	5.36	18.02	24.13	54.91	37.44
Cla013580	Protein phosphatase 2c	4	0.54	0.03	0.03	3.97	0.66	0.04	0	0
Cla013604	Protein phosphatase 2C	8.38	7.67	8.19	12.04	14.99	3.91	10.98	16.81	11.14
Cla015009	Abscisic acid receptor PYL8	189.15	300.81	131.34	178.63	89.58	223.89	128.79	132.34	186.3
Cla015245	9-cis-epoxycarotenoid dioxygenase	36.29	76.43	93.26	96.06	58.33	45.2	74.02	90.02	70.41
Cla015810	Protein phosphatase 2C	37.02	32.34	28.98	32.44	44.85	26.65	31.62	26.25	30.49
Cla016195	Abscisic acid receptor PYR1	13	2.51	0.93	0.99	36.23	4.51	3.28	2.27	0.94
Cla016957	Abscisic acid insensitive 8 homologue	31.64	55.03	38.35	36.3	46.48	28.62	24	25.09	33.71
Cla017544	Protein phosphatase 2c-like protein	21	49.88	22.97	15.59	29.36	27.19	19.93	17.24	14.2
Cla017696	Abscisic acid insensitive	2.2	8.61	11.27	6.45	2.33	5.28	8.17	5.04	5.77
Cla018017	Abscisic acid receptor PYR1	0.97	0.47	2.53	5.83	2.99	0.32	1.21	1.63	1.33
Cla018075	Abscisic acid receptor PYR1	7.85	0.45	0	0.14	3.19	0.97	0.22	0.64	0.1
Cla018208	Protein phosphatase 2C containing protein	7.2	2.33	2.64	0.94	5.19	3.26	1.89	1.7	1.67
Cla018947	Protein phosphatase 2C containing protein	30.09	16.48	22.03	20.66	35.13	13.71	18.37	20.48	17.25
Cla019578	9-cis-epoxycarotenoid dioxygenase 2	0.74	0.64	0.18	0.06	1.56	0.18	0.01	0.04	0.01
Cla019945	Protein phosphatase 2C-like	1.25	5.36	1.93	2.27	2.13	2.53	3.11	2.6	1.61
Cla020071	Abscisic acid insensitive 8 homologue	54.47	35.56	63.94	63.11	41.45	48.14	66.94	55.83	53.55
Cla020413	Protein phosphatase 2C-like	6.87	11.82	27.7	15.76	15.55	9.81	10.03	23.92	9.34
Cla020684	Protein phosphatase 2C containing protein	11.08	2.29	8.72	4.95	7.33	6.42	4.87	7.66	5.22
Cla020886	Abscisic acid receptor PYR1	21.21	5.78	0.25	0	79.45	0.85	0	0.25	0
Cla021167	Abscisic acid receptor PYL8	275.77	112.93	191.27	174.98	89.29	193.45	258.34	183.85	204.27
Cla021736	Protein phosphatase 2C containing protein	30.24	25.81	31.64	21.12	17.87	24.24	36.94	35.92	27.99
Cla023011	Protein phosphatase 2C-like	22.31	19.75	24.71	24.54	18.3	18.29	22.32	36.54	25.89
Cla023373	Protein phosphatase 2C	103.97	70.61	57.85	35.62	87.87	64.74	41.12	56.91	45.99
Cla023452	SnRK1-interacting protein 1	134.58	143.34	136.71	140.56	111.16	106.69	131.38	152.81	143.74
